# Supplementary material
Source: PubMed Central journal article supplement (PMC4440665)

**A**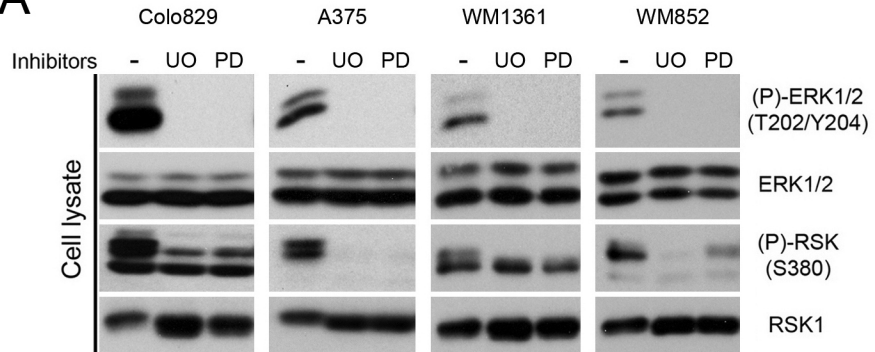**B**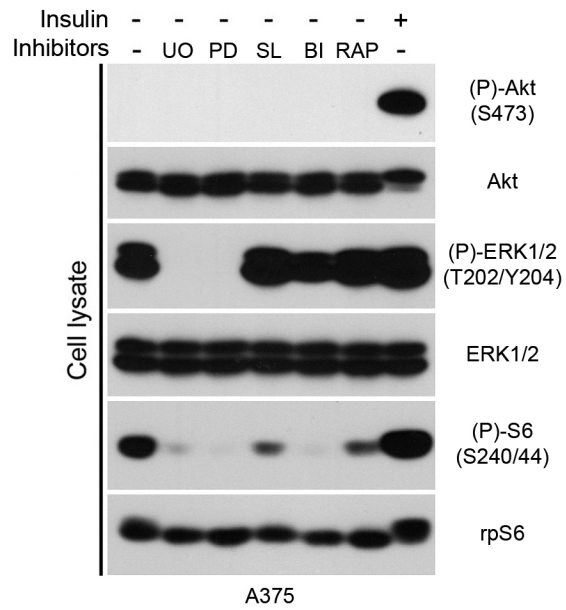

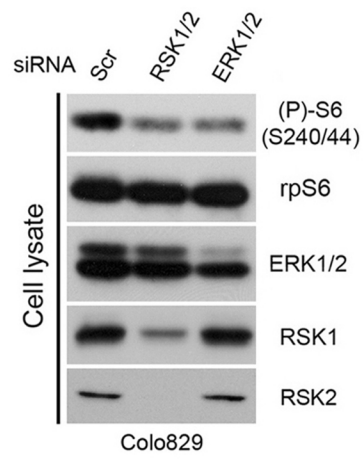

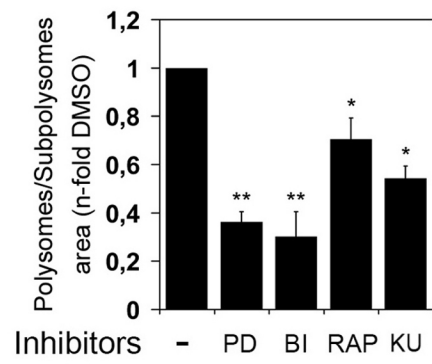

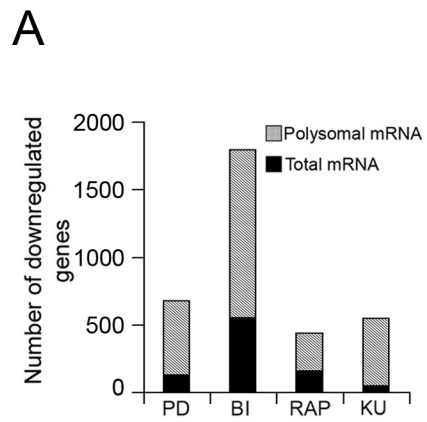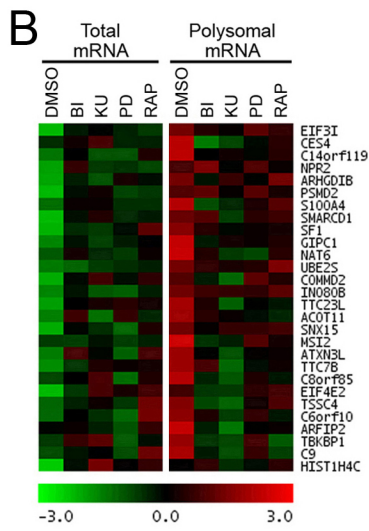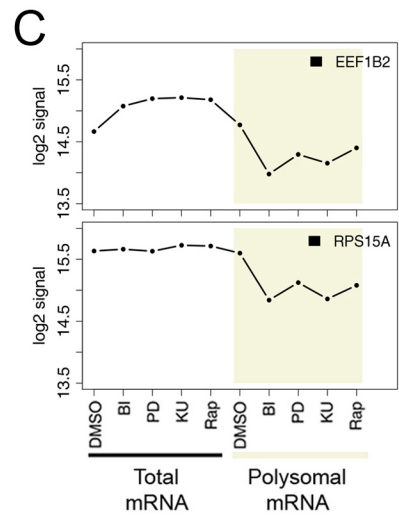

Supplement: NIHMS688242-supplement-Supplement.pdf [file NIHMS688242-supplement-Supplement.pdf]
